# Supplementary material for: Prognostic Nutritional Index Predicts Response and Prognosis in Cancer Patients Treated With Immune Checkpoint Inhibitors: A Systematic Review and Meta-Analysis
Source: PubMed Central journal article supplement (PMC9353139; doi:10.3389/fnut.2022.823087), 2022-07-22
Supplement: Presentation_1.pdf [file Presentation_1.pdf]

Prognostic nutritional index predicts response and prognosis in cancer patients treated with immune checkpoint inhibitors: a systematic review and meta-analysis

Liwei Ni, Jiyuan Ding, Junyan kou, Tingting Shao, Jun Li, Liujie Gao, Wanzhen Zheng, Jing huang\*, Zhen Wu\*

Department of Oncology, Hangzhou cancer hospital, Hangzhou, Zhejiang, 310000, P.R. China

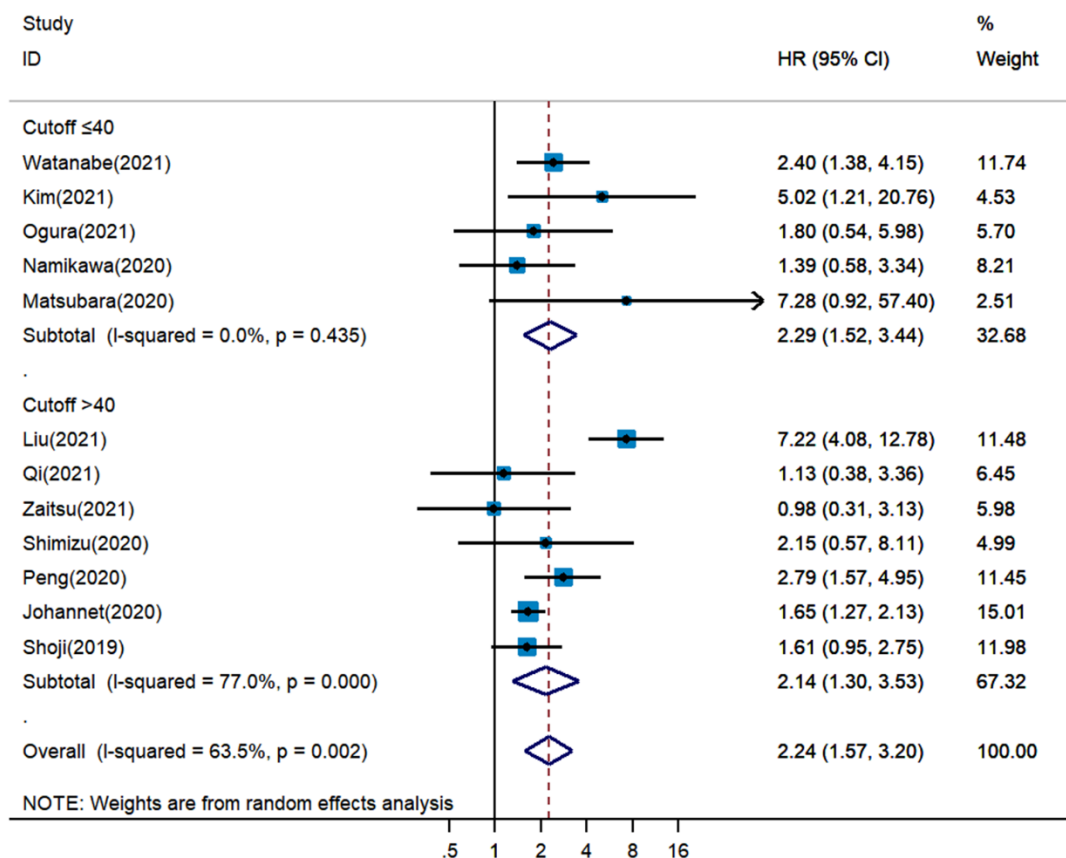

**sFig.1** Meta-analysis of the association between PNI and overall survival stratified by cutoff value among patients treated with immune checkpoint inhibitors

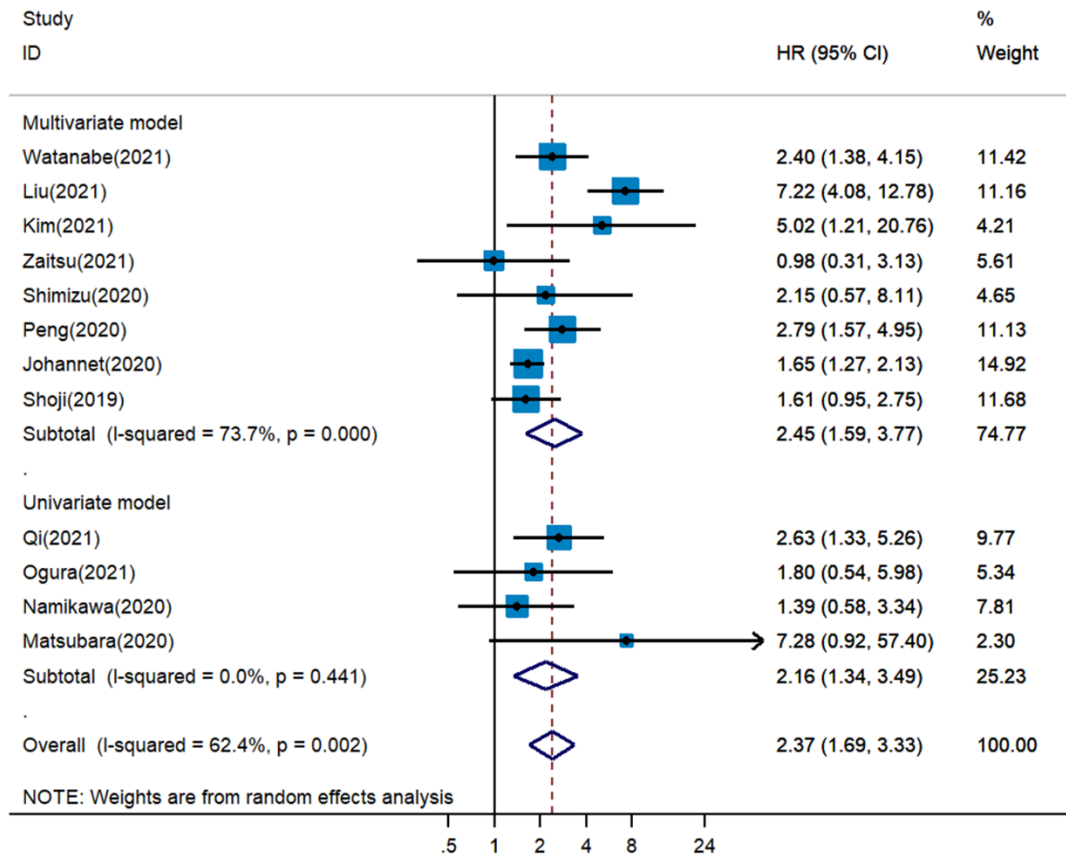

**sFig.2** Meta-analysis of the association between PNI and overall survival stratified by analysis method among patients treated with immune checkpoint inhibitors

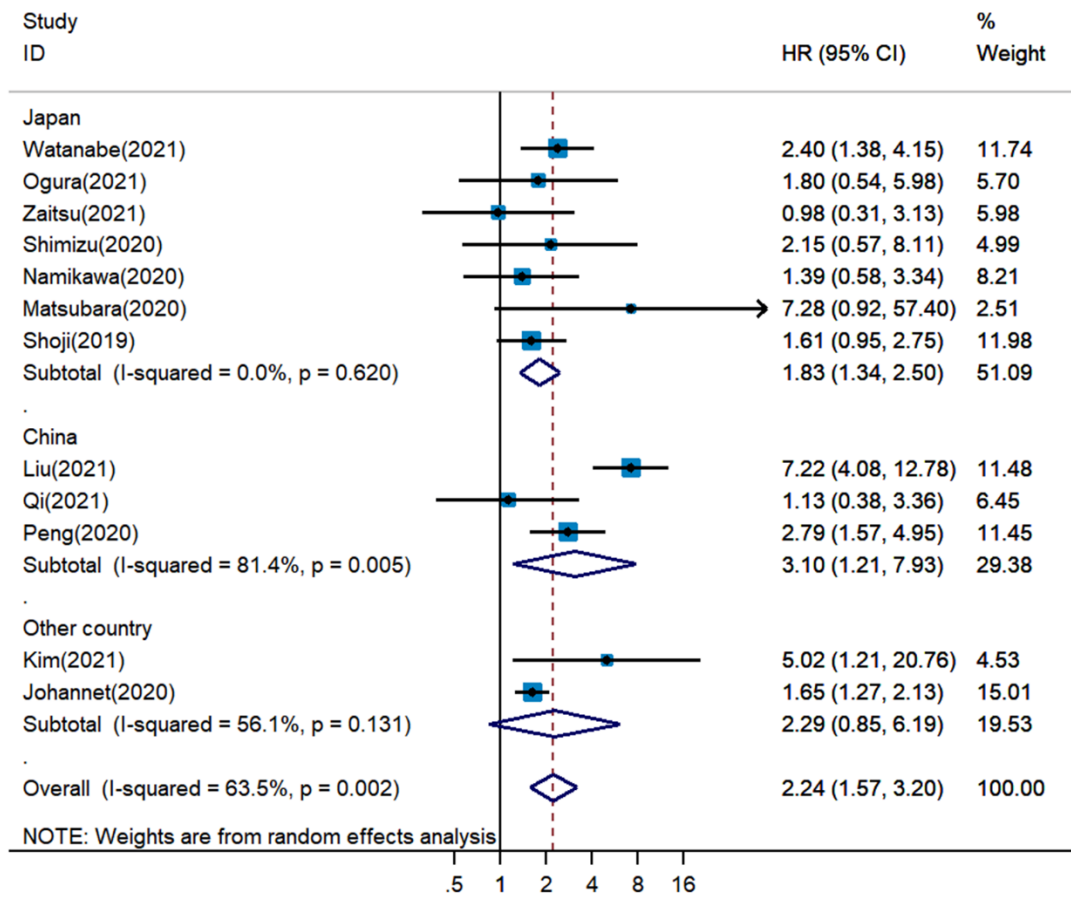

**sFig.3** Meta-analysis of the association between PNI and overall survival stratified by country among patients treated with immune checkpoint inhibitors

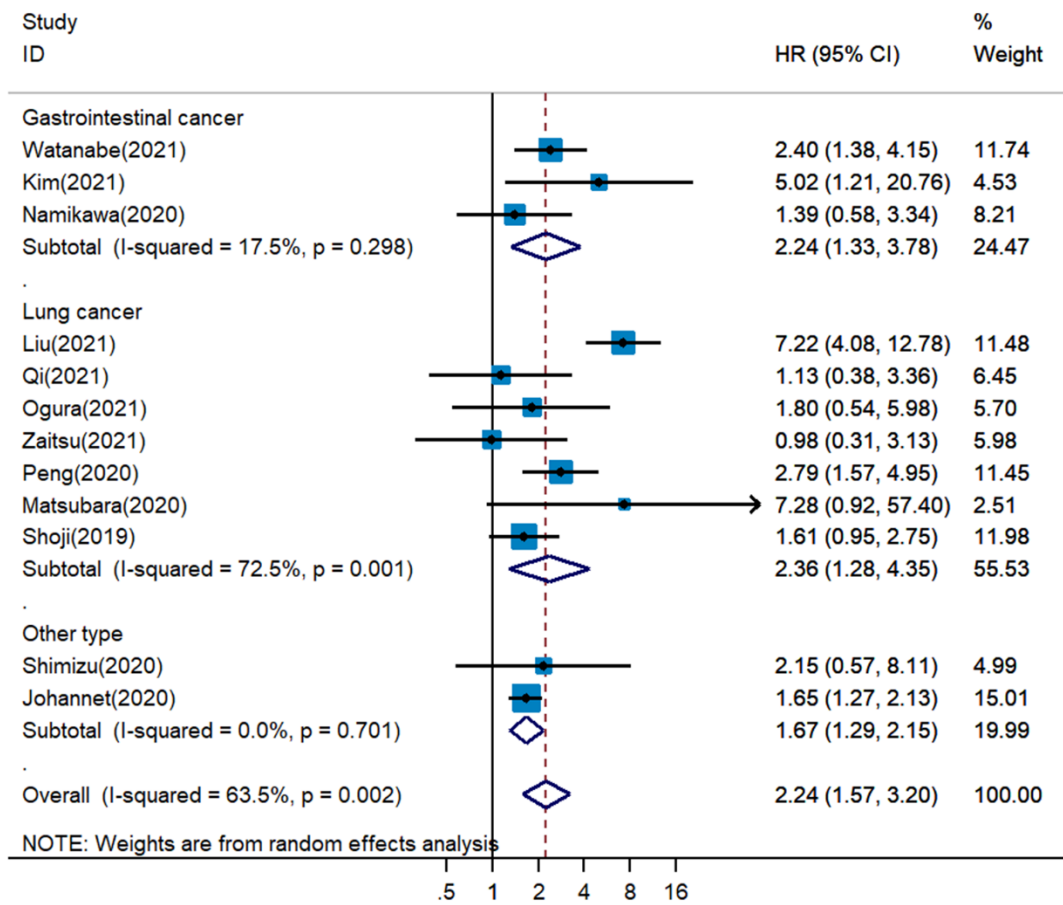

**sFig.4** Meta-analysis of the association between PNI and overall survival stratified by cancer type among patients treated with immune checkpoint inhibitors

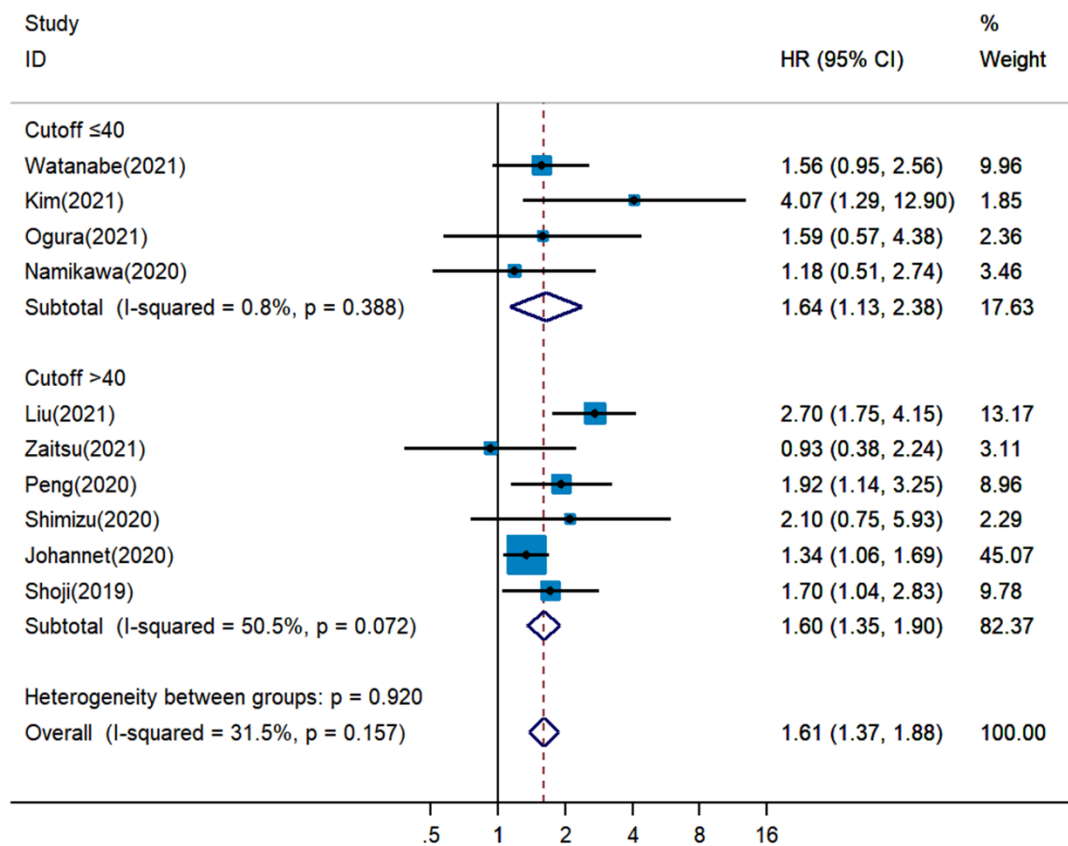

**sFig.5** Meta-analysis of the association between PNI and progressive-free survival stratified by cutoff value among patients treated with immune checkpoint inhibitors

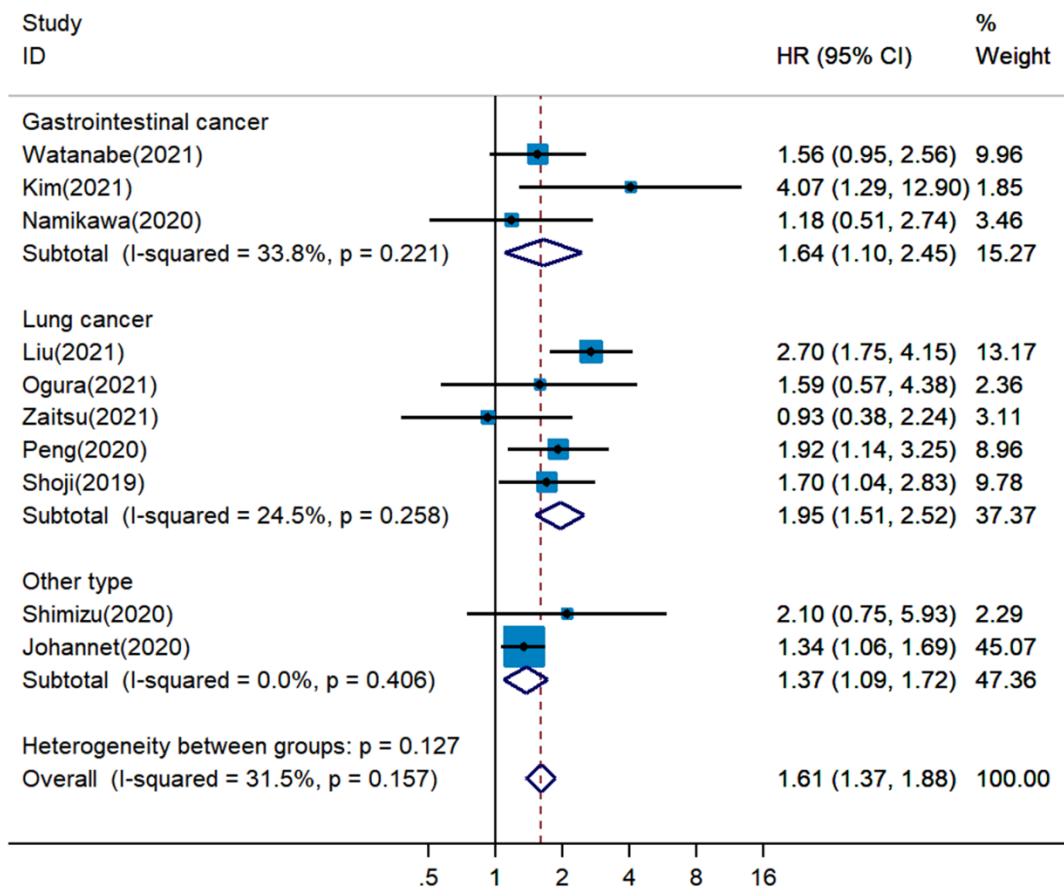

**sFig.6** Meta-analysis of the association between PNI and progressive-free survival stratified by cancer type among patients treated with immune checkpoint inhibitors

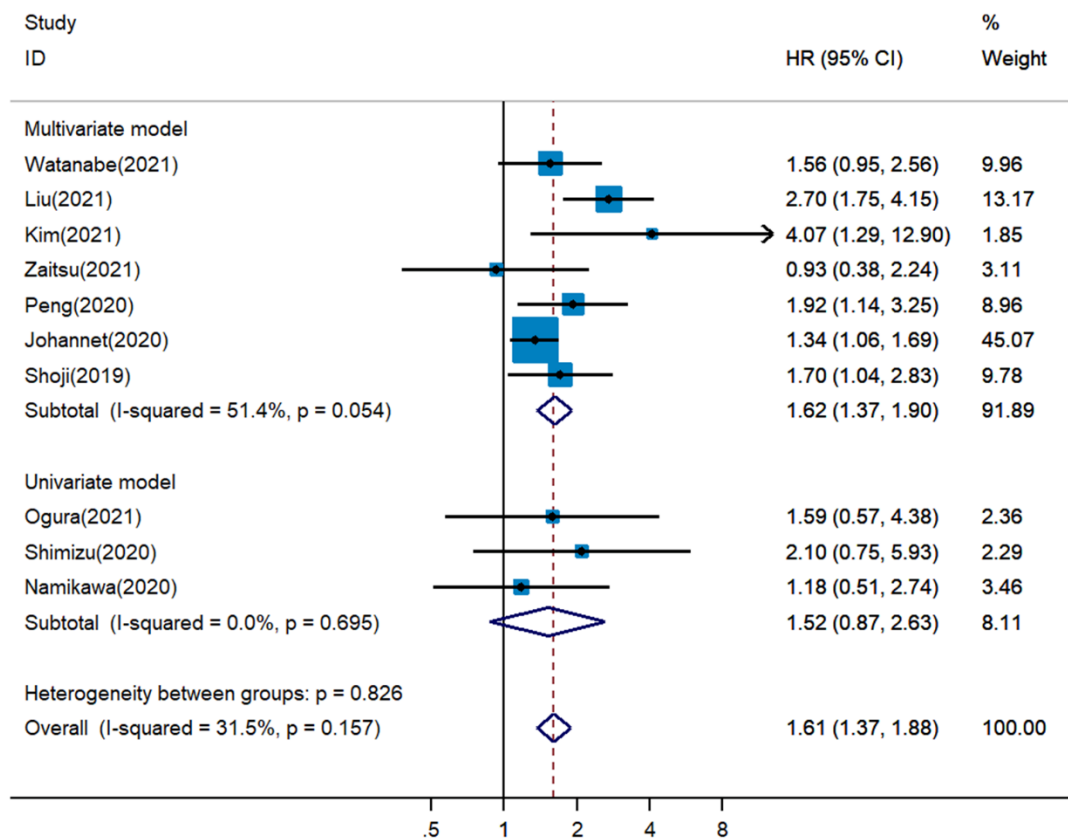

**sFig.7** Meta-analysis of the association between PNI and progressive-free survival stratified by analysis method among patients treated with immune checkpoint inhibitors

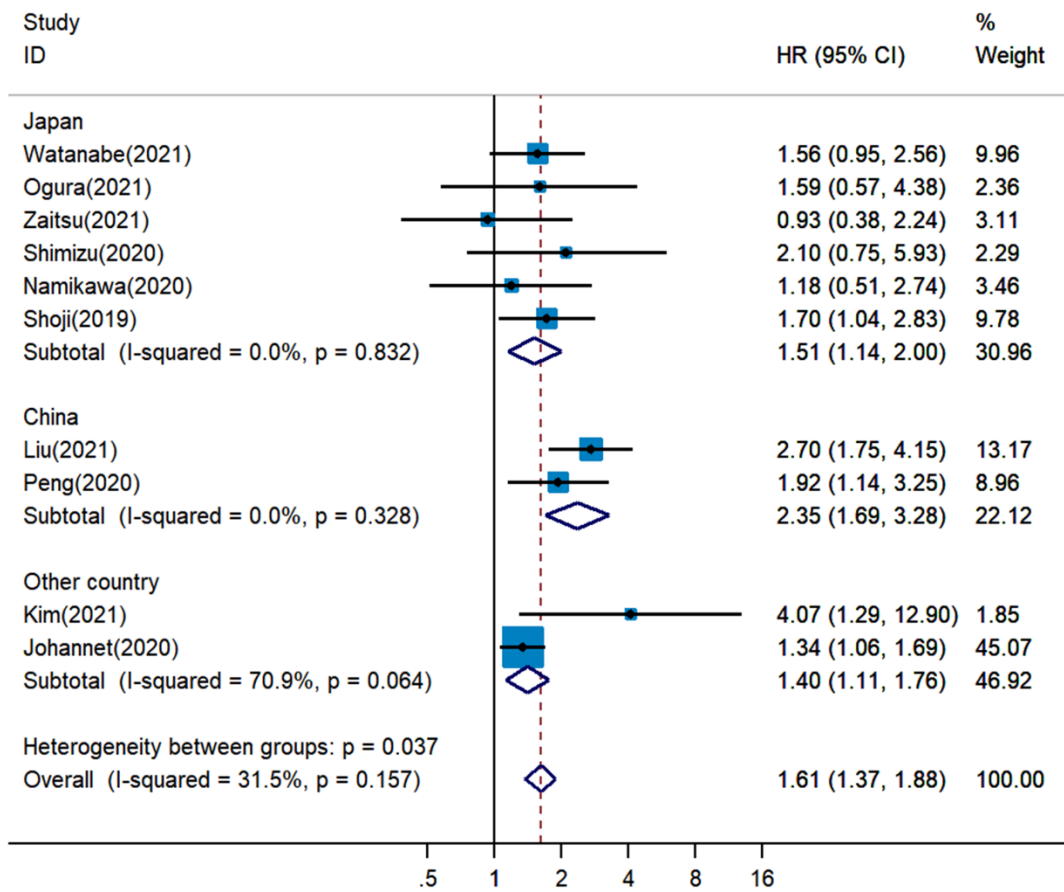

**sFig.8** Meta-analysis of the association between PNI and progressive-free survival stratified by country among patients treated with immune checkpoint inhibitors



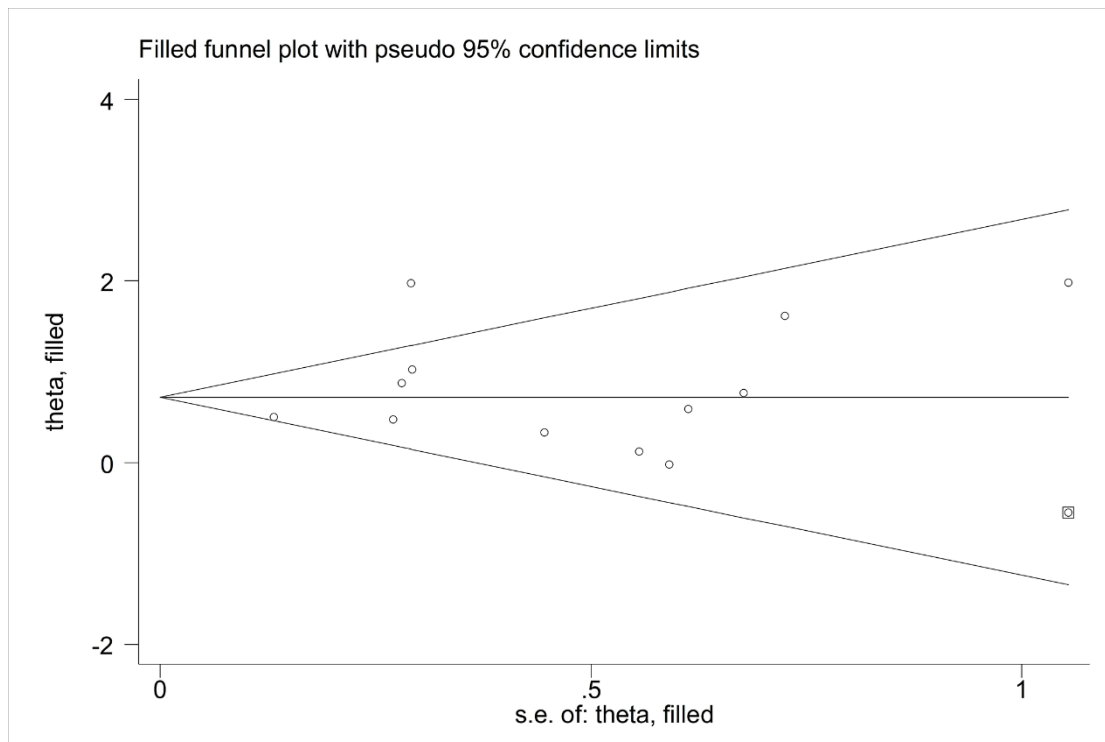

**sFig.9** Metatrim test of studies included in meta-analysis of PNI for OS (new pHR = 2.169, 95%CI = 1.524–3.086)

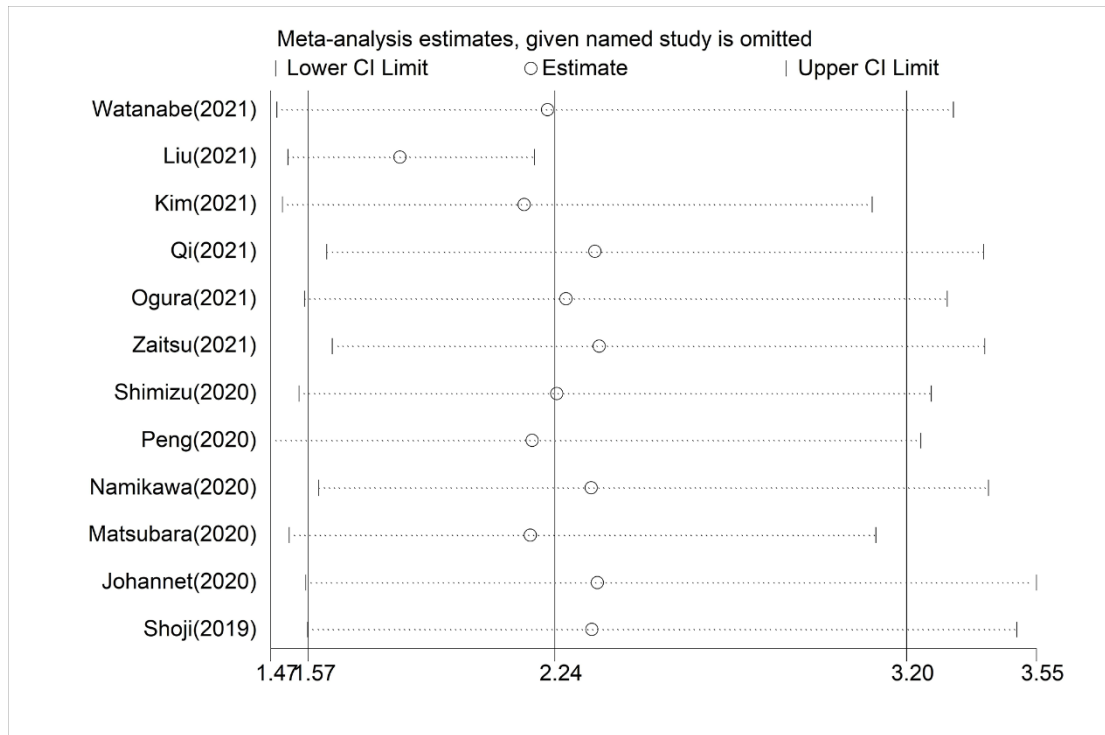

**sFig.10** Metaninf test of studies included in meta-analysis of PNI for OS

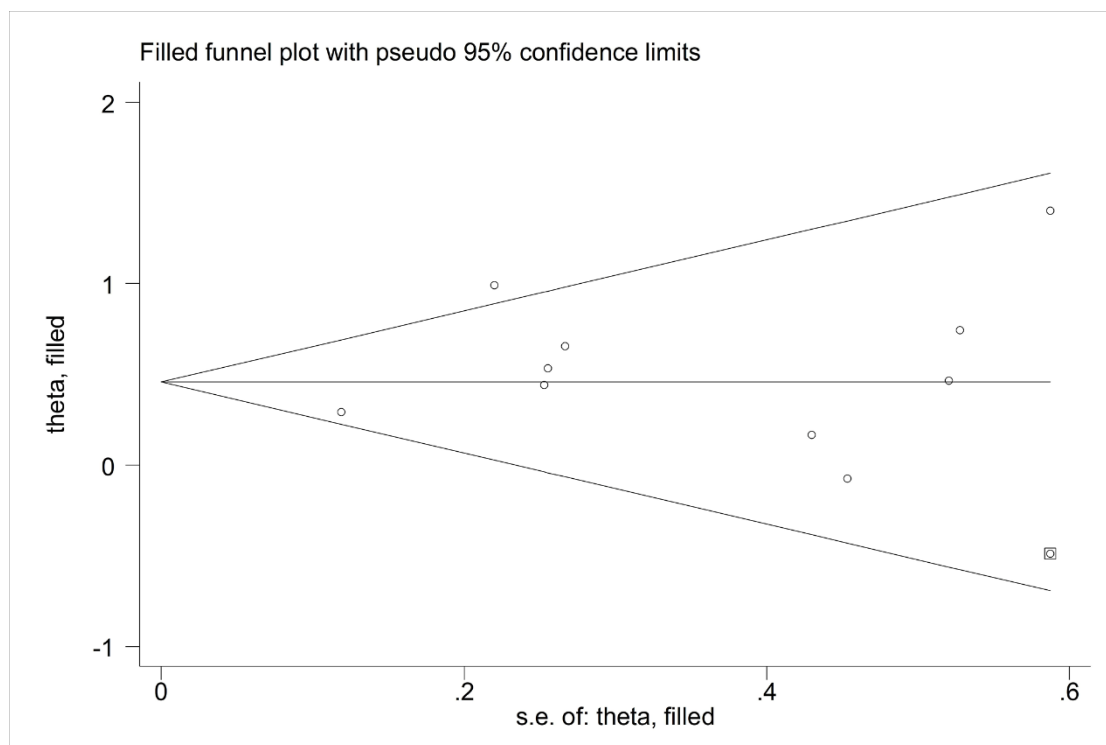

**sFig.11** Metatrim test of studies included in meta-analysis of PNI for PFS (new pHR = 1.580, 95%CI = 1.580–1.353)

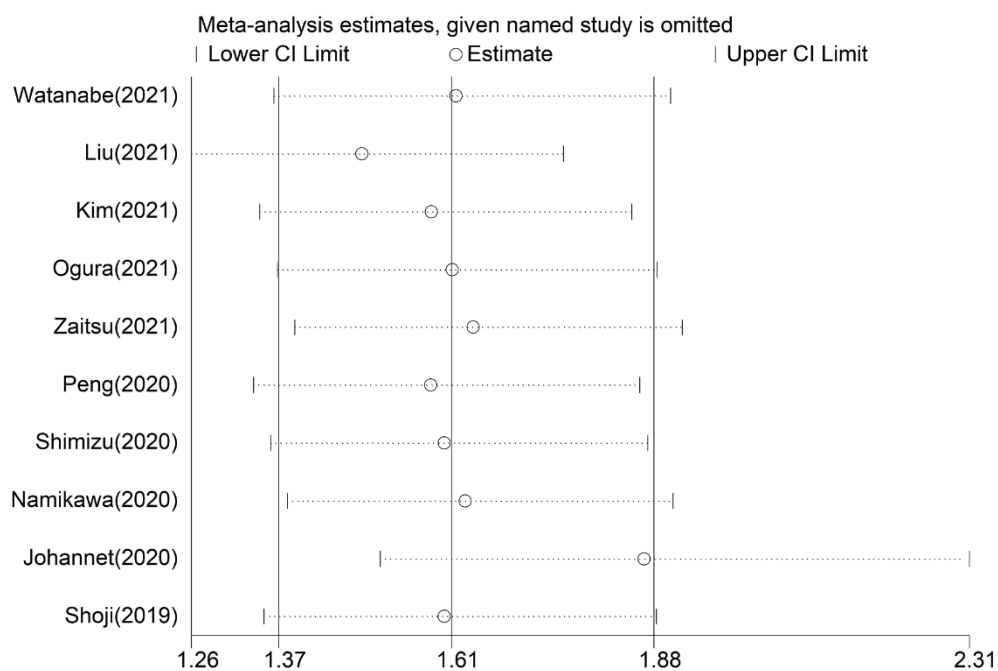

**sFig.12** Metaninf test of studies included in meta-analysis of PNI for PFS
